# Supplementary material for: Couples showing off: Audience promotes both male and female multimodal courtship display in a songbird
Source: PubMed Central journal article supplement — Sci Adv. 2018 Oct 3;4(10):eaat4779. doi: 10.1126/sciadv.aat4779 (PMC6170041; doi:10.1126/sciadv.aat4779), 2018-10-03
Supplement: aat4779_SM.pdf [file aat4779_SM.pdf]

## Supplementary Materials for

### **Couples showing off: Audience promotes both male and female multimodal courtship display in a songbird**

Nao Ota, Manfred Gahr, Masayo Soma\*

\*Corresponding author. Email: [masayo.soma@sci.hokudai.ac.jp](mailto:masayo.soma@sci.hokudai.ac.jp)

Published 3 October 2018, *Sci. Adv.* **4**, eaat4779 (2018)

DOI: [10.1126/sciadv.aat4779](https://doi.org/10.1126/sciadv.aat4779)

#### **The PDF file includes:**

Fig. S1. Examples of tail direction during a courtship display in which a male is courting a female.

Fig. S2. Protocol design and schematic views of the apparatus used in this experiment.

Fig. S3. Cumulative number of pairs that performed duet or solo multimodal displays in the four experimental conditions.

Table S1. The list of subject birds that performed multimodal displays when their partner stayed nearby and the percentage of the dance bouts with tail angling.

Table S2. Results of the same analysis as in Table 2 after eliminating the data from the five pairs whose two audience conditions were conducted on the same day.

Table S3. Results of the same analysis as in Table 2 after eliminating the data from two pairs in which male audience birds danced during the experiment.

Legend for movie S1

#### **Other Supplementary Material for this manuscript includes the following:**

(available at [advances.sciencemag.org/cgi/content/full/4/10/eaat4779/DC1](https://advances.sciencemag.org/cgi/content/full/4/10/eaat4779/DC1))

Movie S1 (.mp4 format). Male blue-capped cordon-bleu courtship display directed to its partner in the presence of a female audience.

## Supplementary Materials

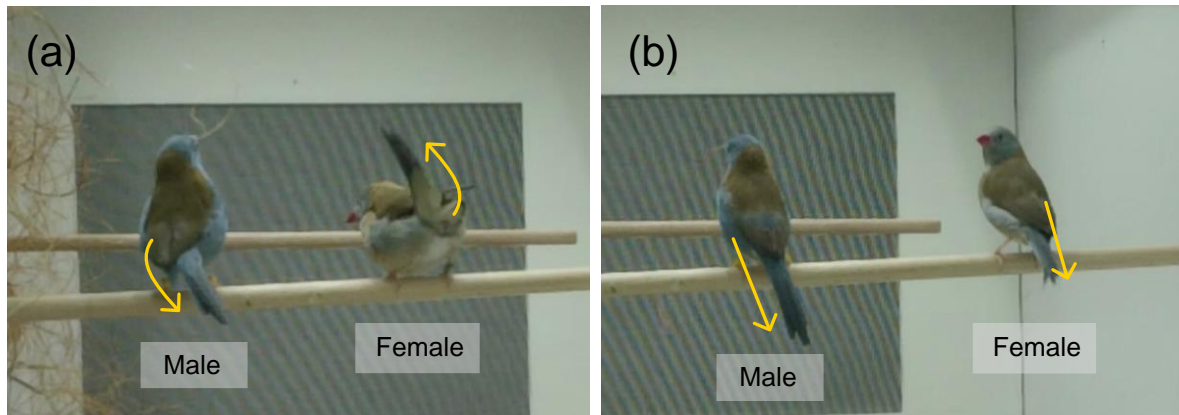

**Fig. S1. Examples of tail direction during a courtship display in which a male is courting a female.** (a) Both male and female cordon-bleus usually angle their tail towards their paired partner when they are sexually motivated. (b) It can be easily distinguished from the usual tail posture, which is along the longitudinal axis of the body. Photo Credit: Nao Ota, Max Planck Institute for Ornithology.

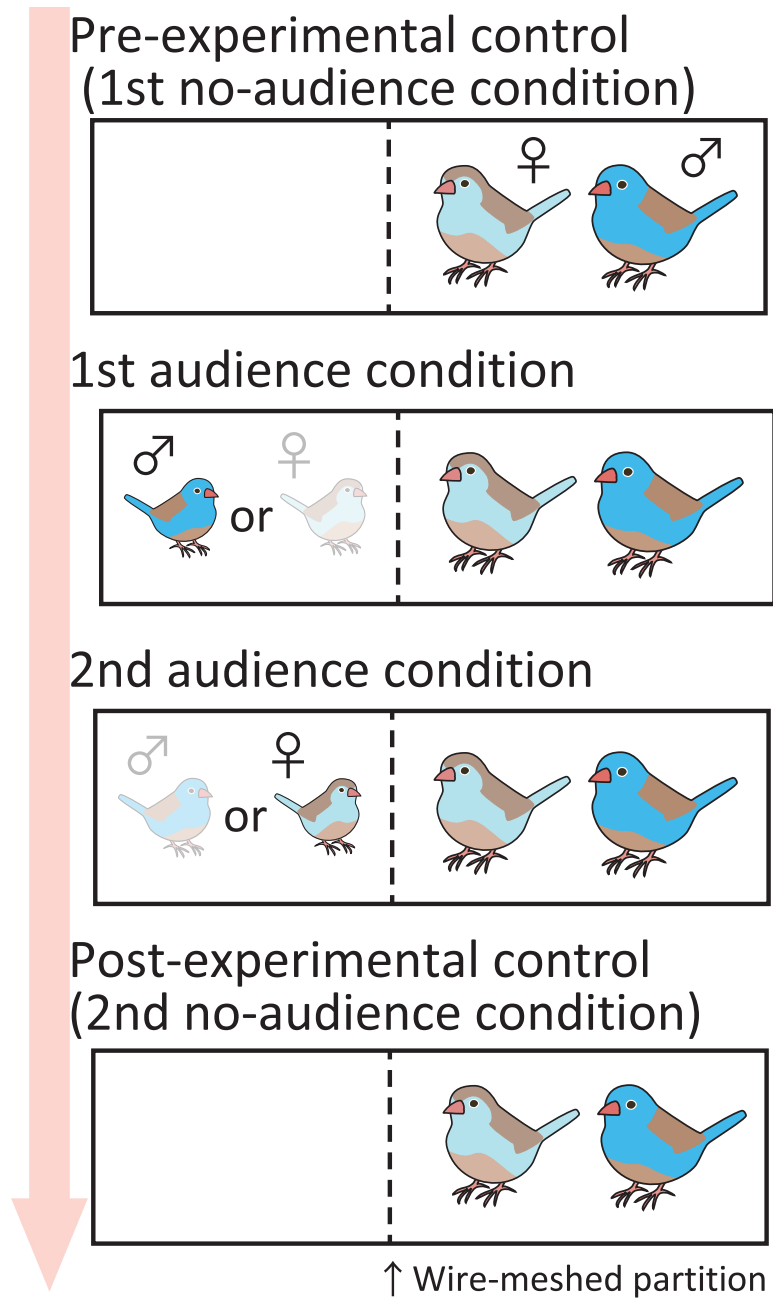

**Fig. S2. Protocol design and schematic views of the apparatus used in this experiment.**

Subjects were first recorded without an audience (pre-experimental control conditions). Then, we introduced male or female audience (1st audience condition), and then the opposite sex audience (2nd audience condition), which was followed by the post-experimental control condition. The order of audience sex was randomized for each pair. Subject birds and audiences were separated by a wire-mesh partition.

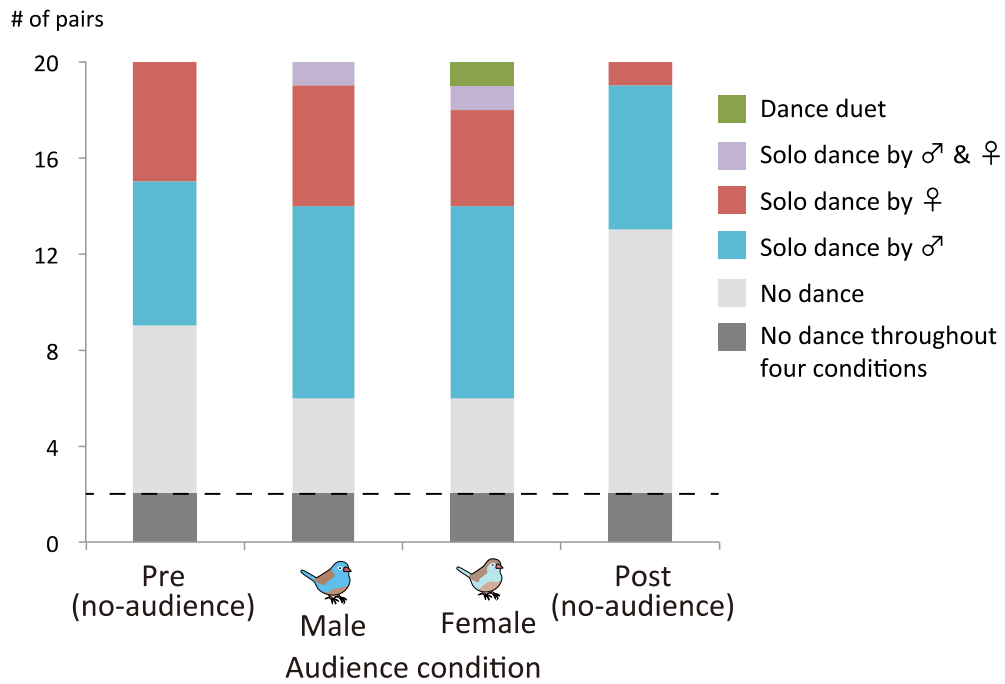

**Fig. S3. Cumulative number of pairs that performed duet or solo multimodal displays in the four experimental conditions.** The purple bar indicates that both sexes of the pair performed multimodal displays, but not simultaneously. Red and blue bars indicate that females or males performed unidirectional multimodal displays, respectively. Pairs in which neither sex danced are represented in grey. Two pairs of both sexes did not dance throughout any of the four conditions and are indicated in dark grey.

**Table S1. The list of subject birds that performed multimodal displays when their partner stayed nearby and the percentage of the dance bouts with tail angling.**

| Bird ID | Sex    | Total no. of dance bouts<br>(when partner stayed nearby) | No. of dance bouts<br>with tail angling | Probability (%) |
|---------|--------|----------------------------------------------------------|-----------------------------------------|-----------------|
| F08     | Female | 3                                                        | 3                                       | 100             |
| F10     | Female | 17                                                       | 16                                      | 94.12           |
| F12     | Female | 1                                                        | 1                                       | 100             |
| M01     | Male   | 1                                                        | 1                                       | 100             |
| M05     | Male   | 15                                                       | 13                                      | 86.67           |
| M06     | Male   | 4                                                        | 4                                       | 100             |
| M08     | Male   | 7                                                        | 1                                       | 14.29           |
| M09     | Male   | 1                                                        | 0                                       | 0               |
| M11     | Male   | 12                                                       | 10                                      | 83.33           |
| M13     | Male   | 5                                                        | 4                                       | 80.00           |
| M14     | Male   | 7                                                        | 7                                       | 100             |
| M19     | Male   | 1                                                        | 1                                       | 100             |
|         |        |                                                          | Average (%)                             | 79.87           |

**Table S2. Results of the same analysis as in Table 2 after eliminating the data from the five pairs whose two audience conditions were conducted on the same day.**

| Response variable                 | Independent variable                        | Coefficient | SE    | z       | p              |
|-----------------------------------|---------------------------------------------|-------------|-------|---------|----------------|
| The number of multimodal displays | Audience sex <sup>a</sup>                   | - 0.922     | 0.134 | - 6.864 | < <b>0.001</b> |
|                                   | The number of audience unimodal displays    | - 0.010     | 0.002 | - 4.734 | < <b>0.001</b> |
|                                   | Present order of audience (first or second) | 0.519       | 0.140 | 3.706   | < <b>0.001</b> |
|                                   | Subject sex <sup>b</sup>                    | 3.867       | 1.780 | 2.172   | <b>0.030</b>   |
| The number of unimodal displays   | Audience sex <sup>a</sup>                   | 0.023       | 0.197 | 0.117   | 0.907          |
|                                   | The number of audience unimodal displays    | - 0.008     | 0.002 | - 3.444 | < <b>0.001</b> |
|                                   | Present order of audience (first or second) | - 1.223     | 0.186 | - 6.585 | < <b>0.001</b> |
|                                   | Subject sex <sup>b</sup>                    | 1.528       | 2.683 | 0.570   | 0.569          |

**Table S3. Results of the same analysis as in Table 2 after eliminating the data from two pairs in which male audience birds danced during the experiment.**

| Response variable                 | Independent variable                        | Coefficient | SE    | z       | p              |
|-----------------------------------|---------------------------------------------|-------------|-------|---------|----------------|
| The number of multimodal displays | Audience sex <sup>a</sup>                   | - 0.711     | 0.108 | - 6.566 | < <b>0.001</b> |
|                                   | The number of audience unimodal displays    | - 0.006     | 0.002 | - 3.395 | < <b>0.001</b> |
|                                   | Present order of audience (first or second) | 0.184       | 0.110 | 1.674   | 0.094          |
|                                   | Subject sex <sup>b</sup>                    | 3.874       | 1.399 | 2.770   | <b>0.006</b>   |
| The number of unimodal displays   | Audience sex <sup>a</sup>                   | - 0.177     | 0.158 | - 1.118 | 0.263          |
|                                   | The number of audience unimodal displays    | - 0.009     | 0.002 | - 5.000 | < <b>0.001</b> |
|                                   | Present order of audience (first or second) | - 0.767     | 0.166 | - 4.630 | < <b>0.001</b> |
|                                   | Subject sex <sup>b</sup>                    | 1.198       | 1.787 | 0.670   | 0.503          |

**Movie S1. Male blue-capped cordon-bleu courtship display directed to its partner in the presence of a female audience.**
